# Supplementary material
Source: PubMed Central journal article supplement (PMC5589071)
Supplement: NIHMS857704-supplement-SupTable.pdf [file NIHMS857704-supplement-SupTable.pdf]

**Table 1: Number of de novo variants identified for each parent-child trio**

| Patient | Chr | StartPosition | VariantType | RefgeneGeneName | RefgeneExonFunction        |
|---------|-----|---------------|-------------|-----------------|----------------------------|
| 1       | 2   | 152473977     | Snv         | NEB             | nonsynonymous SNV          |
| 1       | 2   | 203417544     | Indel       | BMP2            | frameshift deletion        |
| 1       | 3   | 49049511      | Snv         | WDR6            | nonsynonymous SNV          |
| 1       | 6   | 30954393      | Snv         | MUC21           | nonframeshift substitution |
| 1       | 6   | 32485852      | Indel       | HLA-DRB5        | frameshift insertion       |
| 1       | 6   | 32487401      | Snv         | HLA-DRB5        | nonsynonymous SNV          |
| 1       | 7   | 100482040     | Indel       | SRRT            | nonframeshift deletion     |
| 1       | 8   | 10467673      | Snv         | RP1L1           | nonsynonymous SNV          |
| 1       | 11  | 1264328       | Snv         | MUC5B           | nonsynonymous SNV          |
| 1       | 11  | 1264336       | Snv         | MUC5B           | nonsynonymous SNV          |
| 1       | 11  | 1265144       | Snv         | MUC5B           | nonsynonymous SNV          |
| 1       | 11  | 1265339       | Snv         | MUC5B           | nonsynonymous SNV          |
| 1       | 11  | 1265687       | Snv         | MUC5B           | nonsynonymous SNV          |
| 1       | 11  | 1265691       | Indel       | MUC5B           | nonframeshift deletion     |
| 1       | 11  | 1265713       | Indel       | MUC5B           | nonframeshift deletion     |
| 1       | 11  | 1269110       | Snv         | MUC5B           | nonsynonymous SNV          |
| 1       | 11  | 1269856       | Snv         | MUC5B           | nonsynonymous SNV          |
| 1       | 11  | 1269860       | Snv         | MUC5B           | nonsynonymous SNV          |
| 1       | 11  | 66335541      | Snv         | CTSF            | nonsynonymous SNV          |
| 1       | 15  | 41853508      | Indel       | TYRO3           | nonframeshift insertion    |
| 1       | 18  | 34261459      | Indel       | FHOD3           | frameshift deletion        |
| 1       | 19  | 3633460       | Indel       | PIP5K1C         | frameshift deletion        |
| 1       | 19  | 15271953      | Indel       | NOTCH3          | frameshift deletion        |
| 1       | 19  | 47615762      | Indel       | ZC3H4           | nonframeshift deletion     |
| 7       | 3   | 52833908      | Snv         | ITIH3           | nonsynonymous SNV          |
| 7       | 4   | 1388508       | Snv         | CRIPAK          | nonframeshift substitution |
| 7       | 5   | 115148957     | Indel       | CDO1            | splicing                   |
| 7       | 6   | 17605166      | Snv         | FAM8A1          | nonsynonymous SNV          |
| 7       | 6   | 30954694      | Snv         | MUC21           | nonsynonymous SNV          |
| 7       | 6   | 32489854      | Snv         | HLA-DRB5        | nonframeshift substitution |
| 7       | 6   | 168377178     | Snv         | HGC6.3          | nonsynonymous SNV          |
| 7       | 6   | 168377232     | Snv         | HGC6.3          | nonsynonymous SNV          |
| 7       | 12  | 133160024     | Snv         | FBRSL1          | nonsynonymous SNV          |
| 7       | 13  | 21742539      | Indel       | SKA3            | splicing                   |
| 7       | 16  | 54319092      | Snv         | IRX3            | nonsynonymous SNV          |
| 7       | 18  | 30913142      | Indel       | C18orf34        | frameshift insertion       |
| 7       | 19  | 14561855      | Snv         | PKN1            | nonsynonymous SNV          |
| 7       | 19  | 15271746      | Indel       | NOTCH3          | frameshift insertion       |
| 7       | 19  | 58907572      | Indel       | LOC646862       | nonframeshift deletion     |
| 7       | 1   | 248617054     | Indel       | OR2T2           | frameshift insertion       |
| 7       | 21  | 46117285      | Snv         | KRTAP10-12      | nonsynonymous SNV          |
| 7       | 21  | 46117286      | Snv         | KRTAP10-12      | nonsynonymous SNV          |
| 20      | 1   | 152187195     | Snv         | HRNR            | stopgain SNV               |
| 20      | 2   | 25387526      | Snv         | POMC            | nonsynonymous SNV          |
| 20      | 2   | 189943835     | Indel       | COL5A2          | splicing                   |
| 20      | 3   | 50323926      | Snv         | C3orf45         | nonsynonymous SNV          |
| 20      | 4   | 1388508       | Snv         | CRIPAK          | nonframeshift substitution |
| 20      | 4   | 84391410      | Snv         | FAM175A         | nonsynonymous SNV          |
| 20      | 4   | 147561265     | Indel       | POU4F2          | nonframeshift deletion     |

|       |           |       |                  |                            |
|-------|-----------|-------|------------------|----------------------------|
| 20 5  | 138661353 | Indel | MATR3            | splicing                   |
| 20 6  | 30954302  | Snv   | MUC21            | nonsynonymous SNV          |
| 20 6  | 30954374  | Indel | MUC21            | frameshift substitution    |
| 20 6  | 30954378  | Indel | MUC21            | frameshift insertion       |
| 20 6  | 30954393  | Snv   | MUC21            | nonframeshift substitution |
| 20 6  | 30954694  | Snv   | MUC21            | nonsynonymous SNV          |
| 20 9  | 101558679 | Snv   | ANKS6            | nonsynonymous SNV          |
| 20 10 | 3187897   | Snv   | PITRM1           | nonsynonymous SNV          |
| 20 10 | 98273394  | Indel | TLL2             | nonframeshift deletion     |
| 20 11 | 61537824  | Indel | C11orf9          | frameshift deletion        |
| 20 11 | 64119081  | Snv   | CCDC88B          | nonsynonymous SNV          |
| 20 12 | 11546675  | Snv   | PRB2             | nonsynonymous SNV          |
| 20 12 | 14943486  | Snv   | WBP11            | nonsynonymous SNV          |
| 20 12 | 53491528  | Indel | IGFBP6           | nonframeshift deletion     |
| 20 19 | 15271707  | Snv   | NOTCH3           | stopgain SNV               |
| 20 19 | 23836725  | Snv   | ZNF675           | nonsynonymous SNV          |
| 20 22 | 41650469  | Indel | RANGAP1          | nonframeshift deletion     |
| 26 3  | 42251578  | Indel | TRAK1            | nonframeshift deletion     |
| 26 3  | 46751077  | Indel | TMIE             | nonframeshift deletion     |
| 26 3  | 128292319 | Indel | C3orf27          | frameshift deletion        |
| 26 3  | 195506555 | Snv   | MUC4             | nonsynonymous SNV          |
| 26 3  | 195506558 | Snv   | MUC4             | nonsynonymous SNV          |
| 26 4  | 1388438   | Indel | CRIPAK           | frameshift deletion        |
| 26 4  | 54319248  | Indel | FIP1L1           | frameshift deletion        |
| 26 6  | 1390289   | Indel | FOXF2            | nonframeshift deletion     |
| 26 6  | 1611811   | Indel | FOXC1            | nonframeshift insertion    |
| 26 6  | 30954694  | Snv   | MUC21            | nonsynonymous SNV          |
| 26 6  | 30955120  | Indel | MUC21            | nonframeshift deletion     |
| 26 6  | 30994035  | Indel | MUC22            | nonframeshift deletion     |
| 26 6  | 30996691  | Indel | MUC22            | nonframeshift deletion     |
| 26 6  | 30996791  | Indel | MUC22            | nonframeshift deletion     |
| 26 6  | 30996811  | Indel | MUC22            | nonframeshift deletion     |
| 26 6  | 114181210 | Indel | MARCKS           | frameshift insertion       |
| 26 6  | 161519357 | Indel | MAP3K4           | nonframeshift deletion     |
| 26 6  | 170871046 | Snv   | TBP              | nonframeshift substitution |
| 26 7  | 6820986   | Snv   | RSPH10B,RSPH10B2 | nonsynonymous SNV          |
| 26 8  | 101724994 | Indel | PABPC1           | frameshift insertion       |
| 26 9  | 100616704 | Indel | FOXE1            | nonframeshift deletion     |
| 26 9  | 131452286 | Indel | SET              | nonframeshift deletion     |
| 26 10 | 26856216  | Indel | APBB1IP          | nonframeshift insertion    |
| 26 11 | 6578614   | Indel | DNHD1            | nonframeshift deletion     |
| 26 11 | 104878041 | Indel | CASP5            | frameshift deletion        |
| 26 12 | 9085328   | Indel | PHC1             | nonframeshift deletion     |
| 26 12 | 11420392  | Indel | PRB3             | frameshift deletion        |
| 26 12 | 19592757  | Indel | AEBP2            | nonframeshift deletion     |
| 26 12 | 132313145 | Snv   | MMP17            | nonsynonymous SNV          |
| 26 12 | 132628617 | Indel | DDX51            | nonframeshift deletion     |
| 26 13 | 72440705  | Indel | DACH1            | nonframeshift deletion     |
| 26 17 | 17039574  | Indel | MPRIIP           | nonframeshift deletion     |
| 26 17 | 32956192  | Snv   | TMEM132E         | nonsynonymous SNV          |
| 26 17 | 71205865  | Indel | FAM104A          | nonframeshift deletion     |

|       |           |       |        |                         |
|-------|-----------|-------|--------|-------------------------|
| 26 18 | 9887389   | Indel | TXNDC2 | nonframeshift deletion  |
| 26 19 | 3762705   | Snv   | MRPL54 | nonsynonymous SNV       |
| 26 19 | 15272192  | Snv   | NOTCH3 | stopgain SNV            |
| 26 19 | 52888012  | Indel | ZNF880 | frameshift deletion     |
| 26 20 | 61444633  | Indel | OGFR   | frameshift deletion     |
| 26 20 | 61444635  | Indel | OGFR   | frameshift deletion     |
| 26 20 | 61444650  | Indel | OGFR   | nonframeshift deletion  |
| 26 22 | 35661544  | Indel | HMGXB4 | frameshift insertion    |
| 26 X  | 21627678  | Indel | CNKS2  | nonframeshift deletion  |
| 26 X  | 66765170  | Indel | AR     | nonframeshift insertion |
| 26 X  | 140993885 | Indel | MAGEC1 | nonframeshift deletion  |

RefgeneExonLocation

NEB:NM\_001164507:exon75:c.A11082T:p.L3694F,NEB:NM\_001164508:exon75:c.A11082T:p.L3694F,NEB:NM\_C  
BMPR2:NM\_001204:exon11:c.1519delA:p.I507fs,  
WDR6:NM\_018031:exon2:c.A634C:p.N212H,  
MUC21:NM\_001010909:exon2:c.441\_486CAGCACAGCCACCAACTCTGACTCCAGCACAACTCCAGTGAGGC  
HLA-DRB5:NM\_002125:exon5:c.765\_766insA:p.H256fs,  
HLA-DRB5:NM\_002125:exon3:c.C398T:p.A133V,  
SRRT:NM\_001128852:exon7:c.809\_811del:p.270\_271del,SRRT:NM\_001128854:exon7:c.809\_811del:p.270\_271c  
RP1L1:NM\_178857:exon4:c.G3935A:p.G1312E,  
MUC5B:NM\_002458:exon31:c.C6218T:p.P2073L,  
MUC5B:NM\_002458:exon31:c.T6226C:p.W2076R,  
MUC5B:NM\_002458:exon31:c.G7034A:p.R2345H,  
MUC5B:NM\_002458:exon31:c.A7229G:p.N2410S,  
MUC5B:NM\_002458:exon31:c.G7577T:p.R2526I,  
MUC5B:NM\_002458:exon31:c.7581\_7595del:p.2527\_2532del,  
MUC5B:NM\_002458:exon31:c.7603\_7665del:p.2535\_2555del,  
MUC5B:NM\_002458:exon31:c.A11000G:p.N3667S,  
MUC5B:NM\_002458:exon31:c.C11746G:p.P3916A,  
MUC5B:NM\_002458:exon31:c.C11750G:p.T3917R,  
CTSF:NM\_003793:exon2:c.T226G:p.S76A,  
TYRO3:NM\_006293:exon2:c.308\_309insCCTGAA:p.S103delinsSLN,  
FHOD3:NM\_025135:exon12:c.1371\_1372del:p.457\_458del,  
PIP5K1C:NM\_012398:exon17:c.1979delC:p.P660fs,  
NOTCH3:NM\_000435:exon33:c.6461\_6486del:p.2154\_2162del,  
ZC3H4:NM\_015168:exon2:c.57\_80del:p.19\_27del,  
ITIH3:NM\_002217:exon9:c.C1046T:p.T349M,  
CRIPAK:NM\_175918:exon1:c.209\_238CCCATGTGGAGTGCCACCTGCTCATGTGC,  
CDO1:NM\_001801:exon3:c.171-2->T  
FAM8A1:NM\_016255:exon3:c.T863C:p.I288T,  
MUC21:NM\_001010909:exon2:c.C742G:p.P248A,  
HLA-DRB5:NM\_002125:exon2:c.196\_198GAG,  
HGC6.3:NM\_001129895:exon1:c.A155T:p.Q52L,  
HGC6.3:NM\_001129895:exon1:c.T101C:p.V34A,  
FBRSL1:NM\_001142641:exon17:c.C2798T:p.P933L,  
SKA3:NM\_145061:exon5:c.332-1->TGGATATAGTCCACGTGTCAAGAAAAATTCA,NM\_001166017:exon5:c.332-  
IRX3:NM\_024336:exon2:c.G701C:p.G234A,  
C18orf34:NM\_198995:exon10:c.874dupA:p.M292fs,C18orf34:NM\_001105528:exon9:c.874dupA:p.M292fs,  
PKN1:NM\_213560:exon6:c.A922C:p.T308P,PKN1:NM\_002741:exon6:c.A904C:p.T302P,  
NOTCH3:NM\_000435:exon33:c.6692dupC:p.P2231fs,  
LOC646862:NM\_001195135:exon1:c.116\_118del:p.39\_40del,  
OR2T2:NM\_001004136:exon1:c.956\_957insTG:p.T319fs,  
KRTAP10-12:NM\_198699:exon1:c.C169T:p.R57C,  
KRTAP10-12:NM\_198699:exon1:c.G170A:p.R57H,  
HRNR:NM\_001009931:exon3:c.C6910T:p.R2304X,  
POMC:NM\_001035256:exon3:c.C116T:p.T39M,POMC:NM\_000939:exon2:c.C116T:p.T39M,  
COL5A2:NM\_000393:exon16:c.961-2->T  
C3orf45:NM\_153215:exon2:c.G83A:p.S28N,  
CRIPAK:NM\_175918:exon1:c.209\_238CCCATGTGGAGTGCCACCTGCTCATGTGC,  
FAM175A:NM\_139076:exon5:c.C422T:p.T141I,  
POU4F2:NM\_004575:exon2:c.535\_537del:p.179\_179del,

MATR3:NM\_199189:exon16:c.2371+2->ATA,NM\_001194954:exon15:c.2371+2->ATA,NM\_018834:exon13:c.2371  
MUC21:NM\_001010909:exon2:c.C350T:p.A117V,  
MUC21:NM\_001010909:exon2:c.422\_428GAC,  
MUC21:NM\_001010909:exon2:c.426\_427insTGTG:p.T142fs,  
MUC21:NM\_001010909:exon2:c.441\_486CAGCACAGCCACCAACTCTGACTCCAGCACAACTCCAGTGAGGC  
MUC21:NM\_001010909:exon2:c.C742G:p.P248A,  
ANKS6:NM\_173551:exon1:c.G95T:p.G32V,  
PITRM1:NM\_001242307:exon21:c.A2351G:p.N784S,PITRM1:NM\_014889:exon21:c.A2348G:p.N783S,PITRM1:N  
TLL2:NM\_012465:exon1:c.47\_49del:p.16\_17del,  
C11orf9:NM\_001127392:exon5:c.567\_570del:p.189\_190del,C11orf9:NM\_013279:exon5:c.540\_543del:p.180\_181  
CCDC88B:NM\_032251:exon18:c.G3092A:p.R1031H,  
PRB2:NM\_006248:exon3:c.T337A:p.S113T,  
WBP11:NM\_016312:exon10:c.C1213T:p.P405S,  
IGFBP6:NM\_002178:exon1:c.27\_29del:p.9\_10del,  
NOTCH3:NM\_000435:exon33:c.C6732A:p.Y2244X,  
ZNF675:NM\_138330:exon4:c.A1010G:p.E337G,  
RANGAP1:NM\_002883:exon11:c.1101\_1103del:p.367\_368del,  
TRAK1:NM\_014965:exon13:c.1890\_1895del:p.630\_632del,  
TMIE:NM\_147196:exon4:c.370\_375del:p.124\_125del,  
C3orf27:NM\_007354:exon3:c.253\_254del:p.85\_85del,  
MUC4:NM\_018406:exon2:c.G11896A:p.A3966T,  
MUC4:NM\_018406:exon2:c.C11893G:p.H3965D,  
CRIPAK:NM\_175918:exon1:c.139\_161del:p.47\_54del,  
FIP1L1:NM\_001134937:exon16:c.1429\_1430del:p.477\_477del,FIP1L1:NM\_030917:exon16:c.1447\_1448del:p.48  
FOXF2:NM\_001452:exon1:c.107\_109del:p.36\_37del,  
FOXC1:NM\_001453:exon1:c.1131\_1132insGGC:p.G377delinsGG,  
MUC21:NM\_001010909:exon2:c.C742G:p.P248A,  
MUC21:NM\_001010909:exon2:c.1168\_1257del:p.390\_419del,  
MUC22:NM\_001198815:exon3:c.827\_847del:p.276\_283del,  
MUC22:NM\_001198815:exon3:c.3483\_3512del:p.1161\_1171del,  
MUC22:NM\_001198815:exon3:c.3583\_3597del:p.1195\_1199del,  
MUC22:NM\_001198815:exon3:c.3603\_3617del:p.1201\_1206del,  
MARCKS:NM\_002356:exon2:c.454dupA:p.K152fs,  
MAP3K4:NM\_005922:exon17:c.3572\_3577del:p.1191\_1193del,  
TBP:NM\_003194:exon3:c.222\_249GCAGCAGCAGCAGCAGCAGCAGCAGCAG,TBP:NM\_001172085:exon2:c.16  
RSPH10B2:NM\_001099697:exon15:c.C1637T:p.T546M,RSPH10B:NM\_173565:exon15:c.C1637T:p.T546M,  
PABPC1:NM\_002568:exon6:c.761\_762insT:p.K254fs,  
FOXE1:NM\_004473:exon1:c.508\_519del:p.170\_173del,  
SET:NM\_001248001:exon1:c.21\_23del:p.7\_8del,  
APBB1IP:NM\_019043:exon15:c.1800\_1801insCCG:p.P600delinsPP,  
DNHD1:NM\_144666:exon25:c.8089\_8091del:p.2697\_2697del,  
CASP5:NM\_001136112:exon3:c.241delA:p.T81fs,CASP5:NM\_004347:exon3:c.202delA:p.T68fs,CASP5:NM\_0011  
PHC1:NM\_004426:exon8:c.1275\_1277del:p.425\_426del,  
PRB3:NM\_006249:exon3:c.666\_724del:p.222\_242del,  
AEBP2:NM\_153207:exon1:c.124\_126del:p.42\_42del,AEBP2:NM\_001114176:exon1:c.124\_126del:p.42\_42del,  
MMP17:NM\_016155:exon1:c.G106A:p.G36S,  
DDX51:NM\_175066:exon1:c.223\_225del:p.75\_75del,  
DACH1:NM\_004392:exon1:c.201\_203del:p.67\_68del,DACH1:NM\_080760:exon1:c.201\_203del:p.67\_68del,DACH  
MPRIP:NM\_201274:exon6:c.546\_551del:p.182\_184del,MPRIP:NM\_015134:exon6:c.546\_551del:p.182\_184del,  
TMEM132E:NM\_207313:exon5:c.G1037A:p.R346Q,  
FAM104A:NM\_001098832:exon4:c.425\_427del:p.142\_143del,FAM104A:NM\_032837:exon3:c.362\_364del:p.121\_

TXNDC2:NM\_032243:exon2:c.712\_756del:p.238\_252del,TXNDC2:NM\_001098529:exon2:c.913\_957del:p.305\_31  
MRPL54:NM\_172251:exon1:c.A7G:p.T3A,  
NOTCH3:NM\_000435:exon33:c.A6247T:p.K2083X,  
ZNF880:NM\_001145434:exon4:c.1179\_1203del:p.393\_401del,  
OGFR:NM\_007346:exon7:c.1666delG:p.E556fs,  
OGFR:NM\_007346:exon7:c.1668\_1678del:p.556\_560del,  
OGFR:NM\_007346:exon7:c.1683\_1730del:p.561\_577del,  
HMGXB4:NM\_001003681:exon5:c.1163dupA:p.E388fs,  
CNKSR2:NM\_014927:exon20:c.2635\_2637del:p.879\_879del,CNKSR2:NM\_001168648:exon20:c.2635\_2637del:p  
AR:NM\_000044:exon1:c.182\_183insGCAGCA:p.Q61delinsQQQ,  
MAGEC1:NM\_005462:exon4:c.695\_799del:p.232\_267del,

04543:exon71:c.A10317T:p.L3439F,

C,

del,SRRT:NM\_015908:exon7:c.809\_811del;p.270\_271del,SRRT:NM\_001128853:exon7:c.809\_811del;p.2

1->TGGATATAGTCCACGTGTCAAGAAAAATTCA

|+2->ATA,NM\_001194956:exon12:c.1507+2->ATA,NM\_001194955:exon13:c.2371+2->ATA

C,

M\_001242309:exon18:c.A2054G:p.N685S,

del,

3\_483del,FIP1L1:NM\_001134938:exon13:c.1225\_1226del:p.409\_409del,

2\_189GCAGCAGCAGCAGCAGCAGCAGCAGCAG,

136109:exon2:c.28delA:p.T10fs,

1:NM\_080759:exon1:c.201\_203del:p.67\_68del,

122del,



19del,

.879\_879del,CNKSR2:NM\_001168649:exon19:c.2488\_2490del:p.830\_830del,CNKSR2:NM\_001168647:e

70\_271del,



xon19:c.2545\_2547del;p.849\_849del,
